# Supplementary material
Source: Springer Nature journal article supplement (https://www.springermedizin.de/resource/supplementary/13032_2012_59_MOESM3_ESM.pdf/9651544)

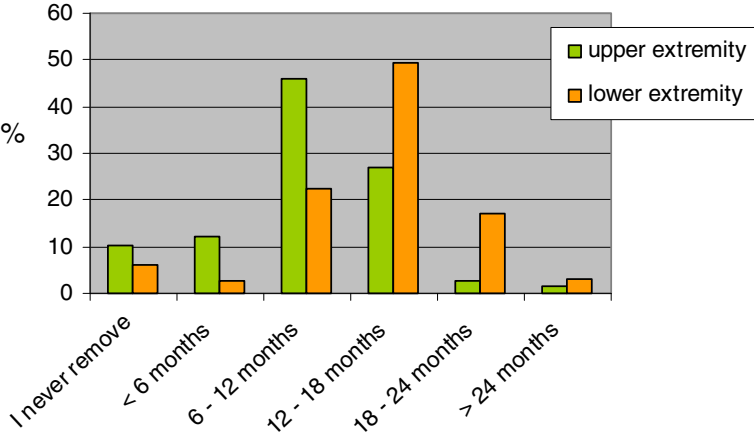

Supplement: MOESM3 [file 9651544]
